# Supplementary material for: Insight into the electronic and thermodynamic properties of NbSi2 from first-principles calculations
Source: Royal Society of Chemistry journal article supplement (doi:10.1039/c8ra04959a), 2018-01-01
Supplement: c8ra04959a1.pdf [file c8ra04959a1.pdf]

### Supporting Information:

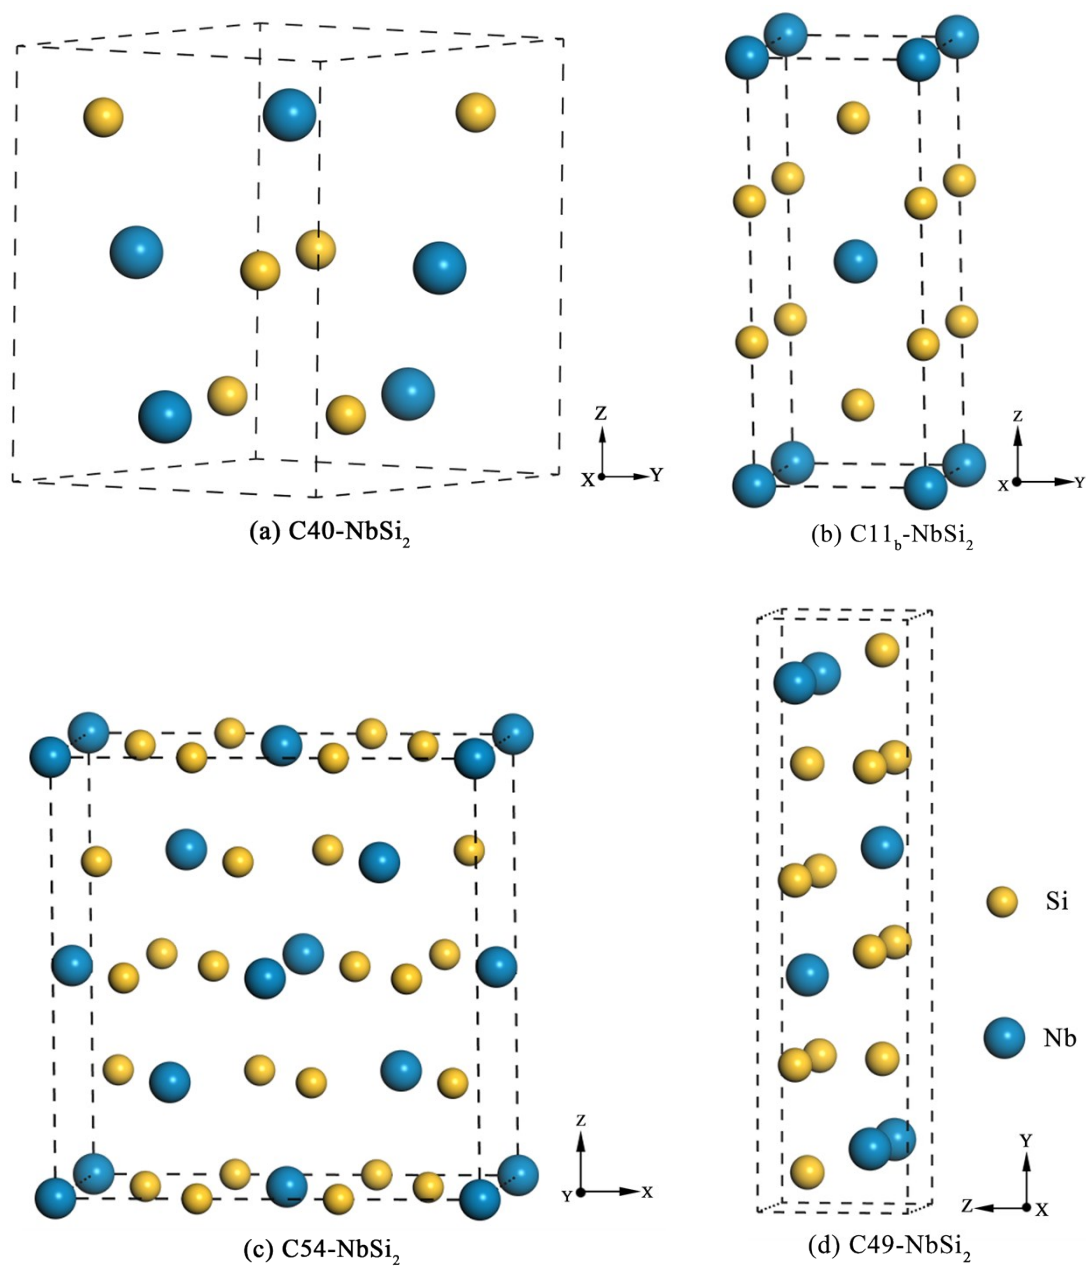

**Fig.** The designed four crystal structures for NbSi<sub>2</sub> based on ref<sup>15-17</sup>.

15 K. Tanaka, K. Nawata, H. Inui, M. Yanmaguchi and M. Koiwa, *Intermetallics*, 2001, **9**, 603-607.

17 X. Zhang, Z. Wang and Y. Qiao, *Acta Mater.*, 2011, **59**, 5584-5592.
